# Supplementary material
Source: PubMed Central journal article supplement (PMC8975919)
Supplement: 12264_2021_779_MOESM1_ESM.pdf [file 12264_2021_779_MOESM1_ESM.pdf]

## Supplemental Information

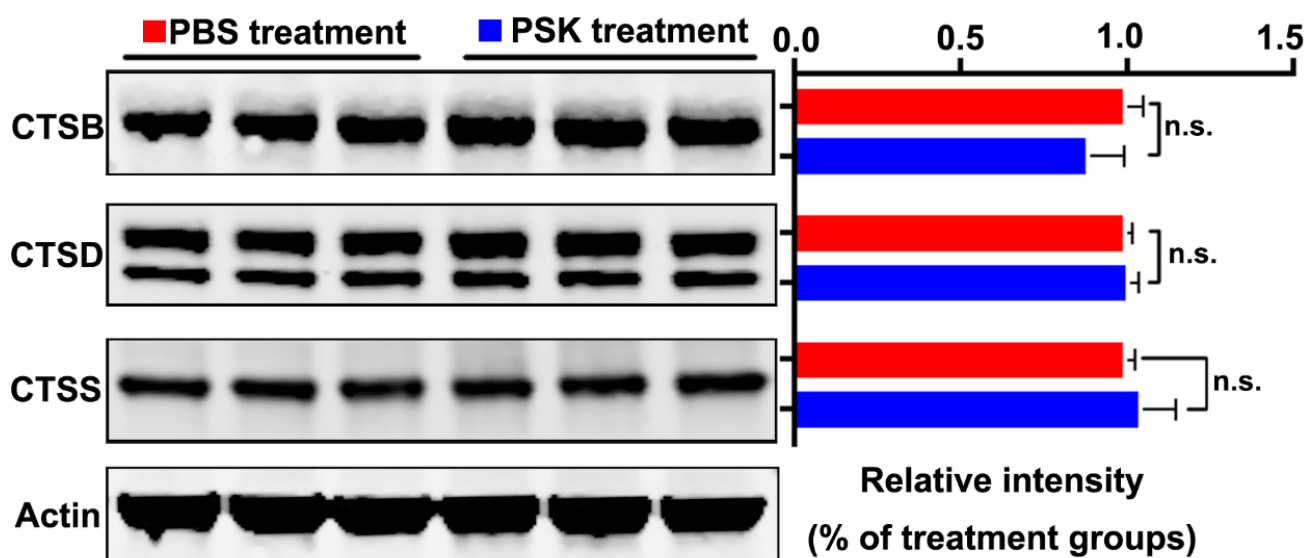

**Fig. S1 PSK has no effect on the expression of lysosomal A $\beta$ -degrading enzymes in monocytes.**

Western blots and quantitative analysis of the lysosomal A $\beta$ -degrading enzymes cathepsin B, cathepsin D, and cathepsin S (mean  $\pm$  SEM of triplicate wells in each treatment group; n.s., not significantly different, Student's *t*-test). PSK, polysaccharide kestin, A $\beta$ , amyloid  $\beta$ -protein; PBS, phosphate-buffered saline; CTSB, cathepsin B; CTSD, cathepsin D; CTSS, cathepsin S.

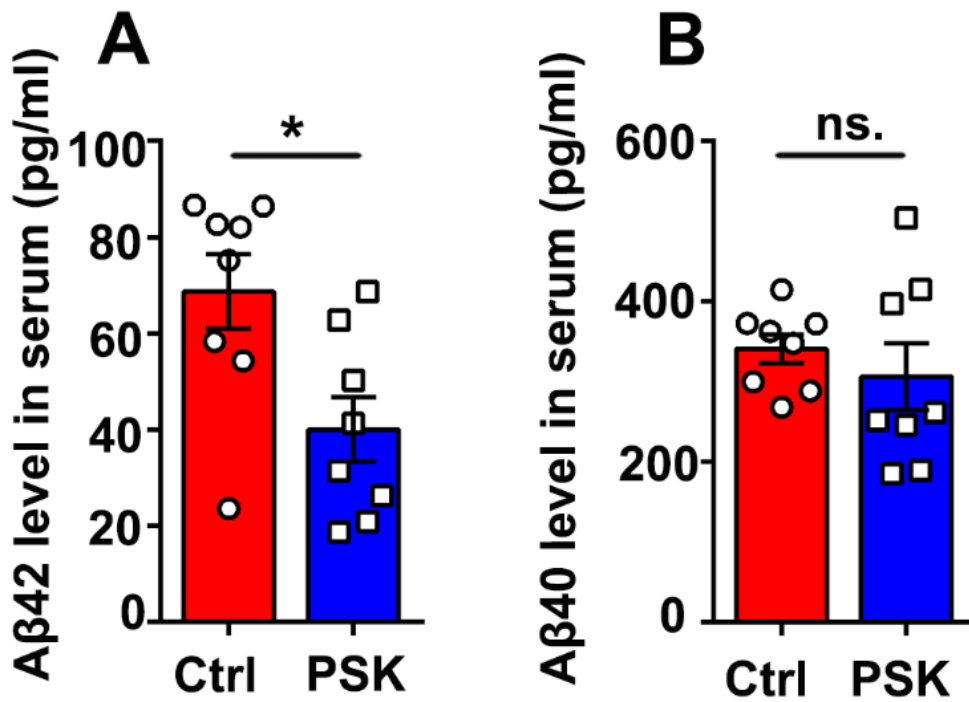

**Fig. S2 PSK reduces Aβ<sub>42</sub> levels in the blood of APP/PS1 mice.** Aβ<sub>42</sub> (A) and Aβ<sub>40</sub> (B) levels in blood of APP/PS1 mice from ELISA (n = 8 per group; mean ± SEM; \*p < 0.05, n.s., not significantly different, Student's *t*-test. PSK, polysaccharide kestun; CON, control; Tg, transgenic, Aβ, amyloid-β.

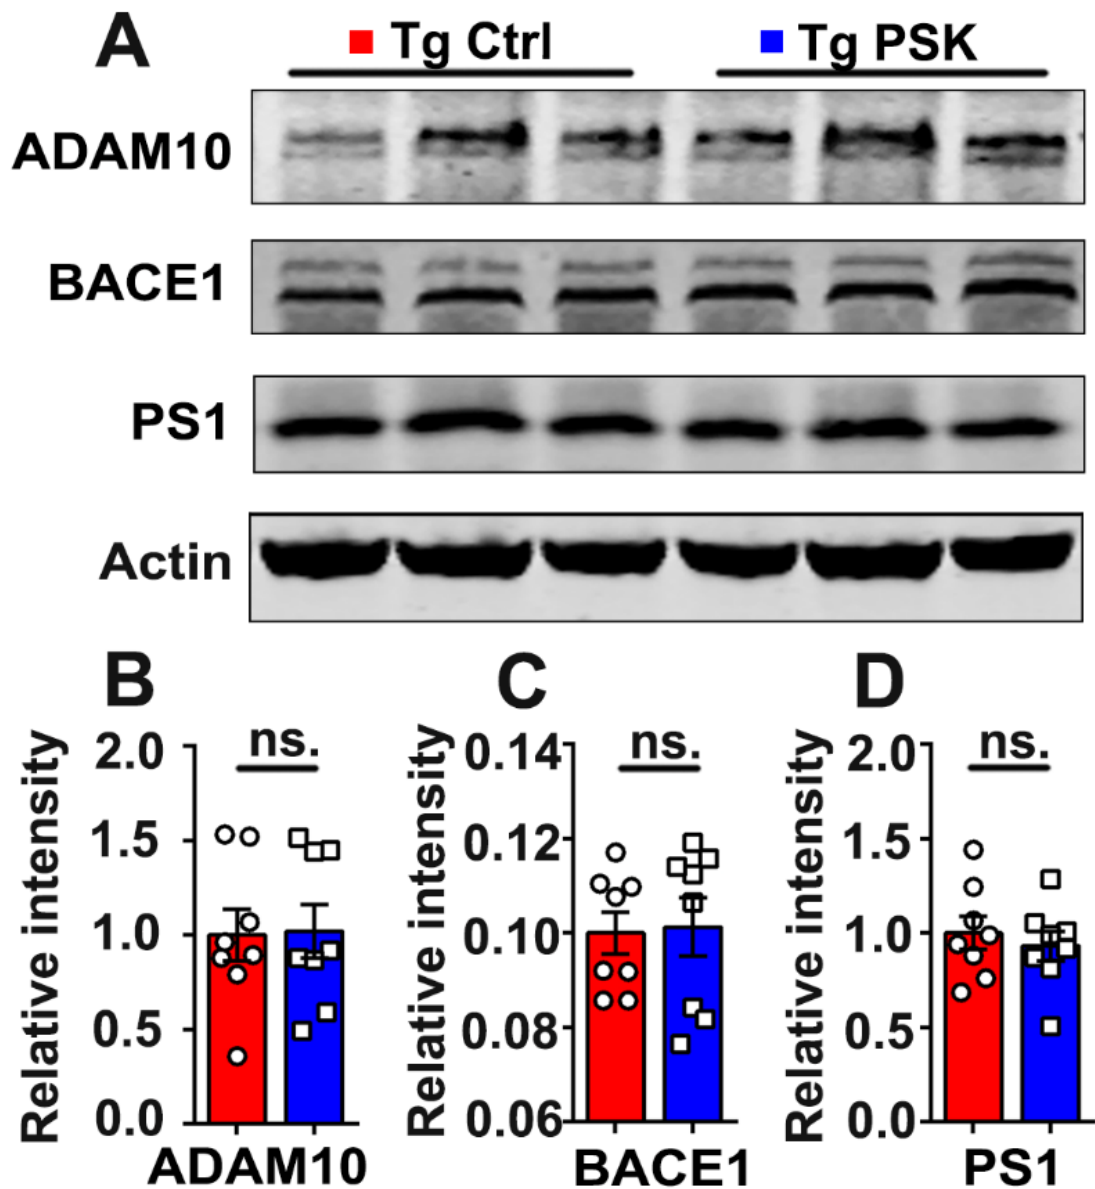

**Fig. S3 PSK has no effect on the expression of APP metabolism-related enzymes.** Images of western blots (A) and quantitative analysis for the APP metabolism-related enzymes ADAM10, BACE1, and PS1 (B–C) in brain homogenates (n = 8 per group; mean ± SEM.; n.s, not significantly different, Student’s *t*-test). PSK, polysaccharide kestlin; Ctrl, control; Tg, transgenic; A $\beta$ , amyloid- $\beta$ ; TLR2, toll-like receptor 2; ADAM10, metalloprotease 10; BACE1,  $\beta$ -site APP cleaving enzyme; PS1, presenilin 1.

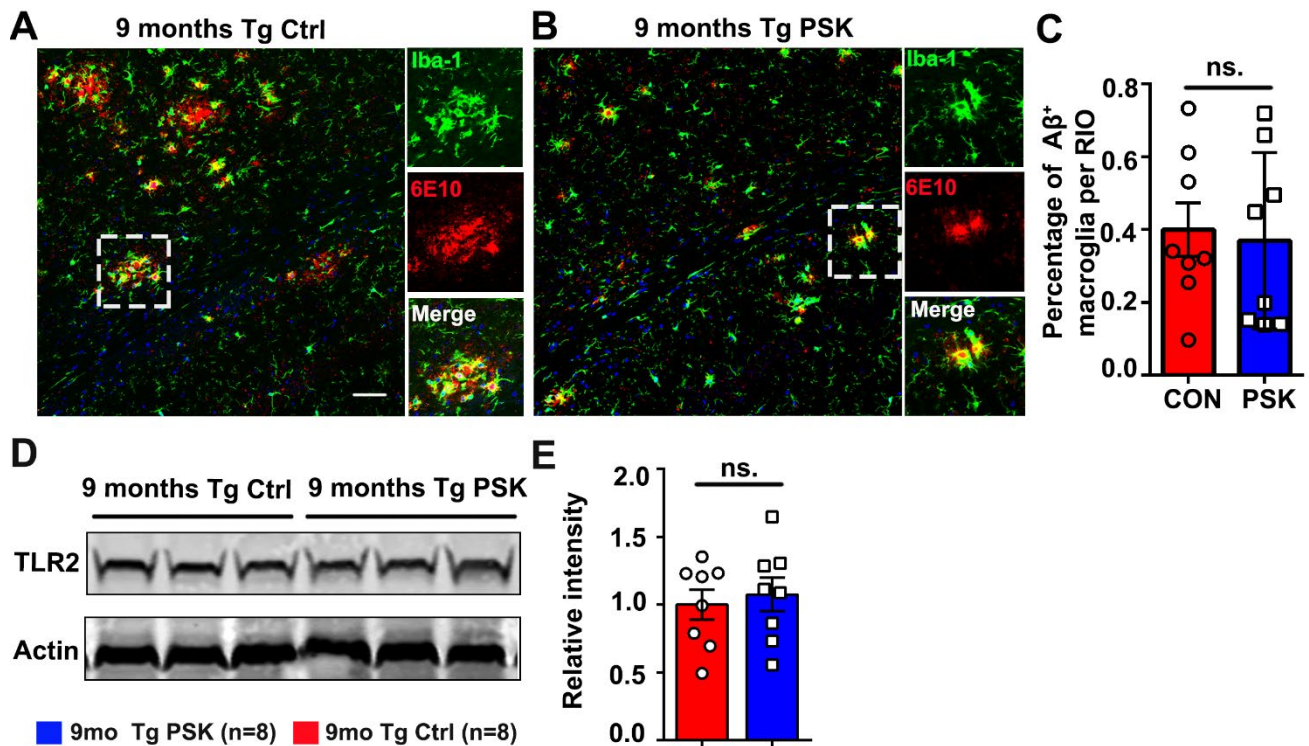

**Fig. S4 PSK has no effect on A $\beta$  uptake by microglia in the brain of AD mice.** (A–C) Confocal stack images of microglia and A $\beta$  plaques in the CA1 region of the hippocampus stained with anti-Iba1 and anti-A $\beta$  (6E10), and quantitative analysis of immunoreactive area of co-localized A $\beta$  and IBA1 in APP/PS1 mice in the two groups. Insets: representative morphology at a higher magnification. Scale bar, 50  $\mu$ m. (D) Western blots and quantitative analysis of TLR2 expression in the brains of APP/PS1 mice. n = 8 per group; mean  $\pm$  SEM; n.s., no significant difference, Student's *t*-test. TLR2, toll-like receptor 2; PSK, polysaccharide kestlin; Ctrl, control; Tg, transgenic, A $\beta$ , amyloid- $\beta$ .

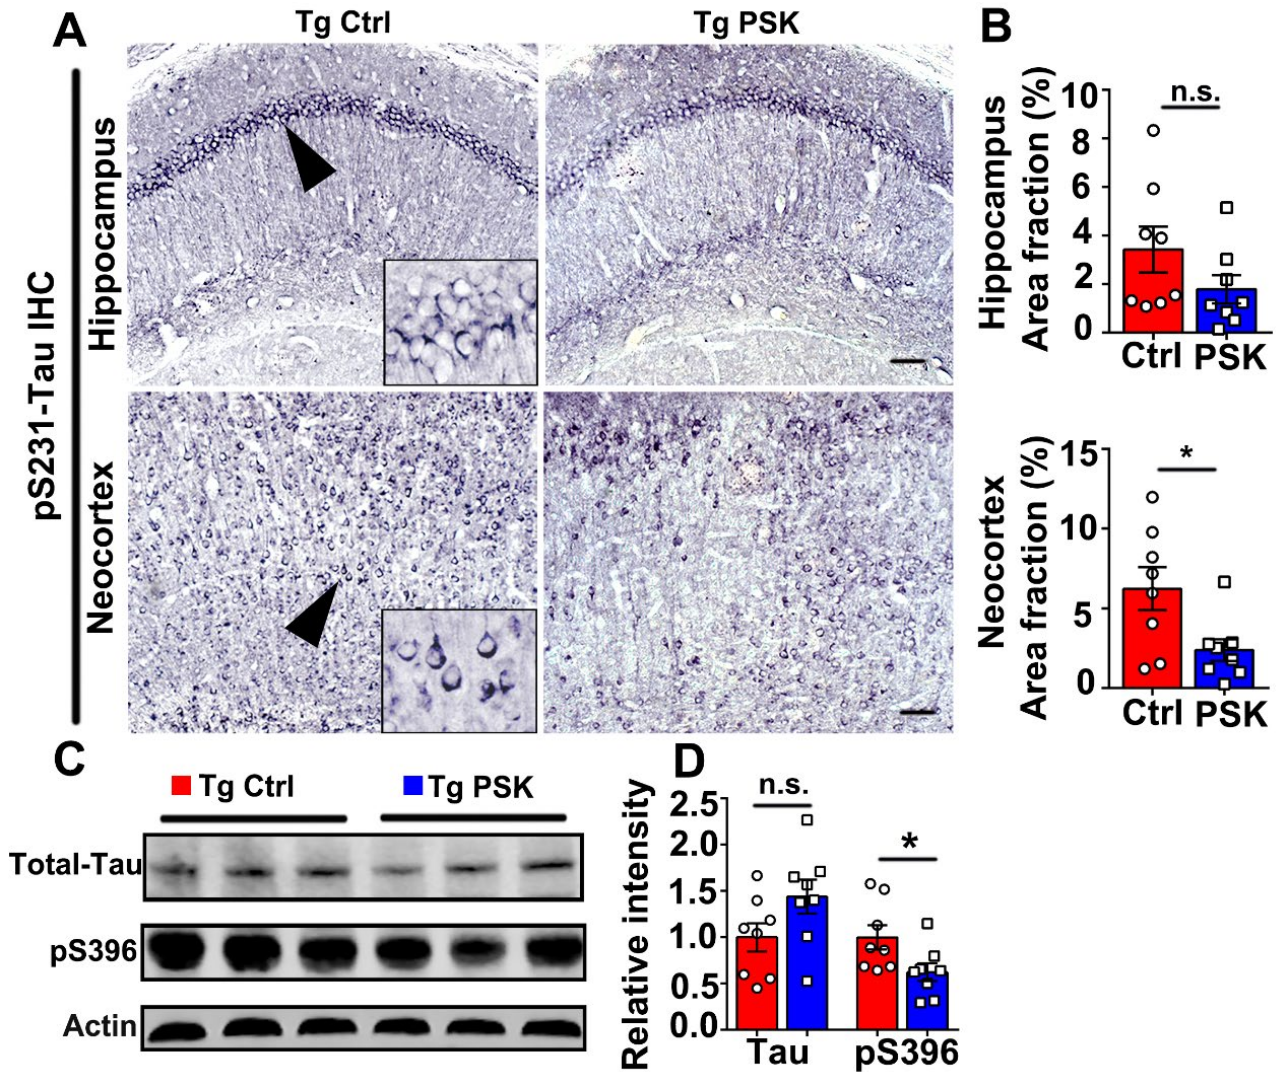

**Fig. S5 PSK attenuates tau phosphorylation in APP/PS1 mice.** (A, B) Quantification of tau phosphorylation using pSer231-Tau immunohistochemistry. Insets: representative morphology at a higher magnification. Scale bars, 100  $\mu$ m. (C, D) Western blots and quantification of phosphorylated tau at the pS396 site and total tau (T-tau) in brain homogenates (n = 8 per group; mean  $\pm$  SEM \*p < 0.05, n.s., not significantly different, Student's *t*-test. PSK, polysaccharide kestlin; Ctrl, control; WT, wild-type; Tg, transgenic.
